# Supplementary material for: Controllable growth of SnS2 nanostructures on nanocarbon surfaces for lithium-ion and sodium-ion storage with high rate capability
Source: Royal Society of Chemistry journal article supplement (doi:10.1039/c7ta09757c), 2017-12-19
Supplement: c7ta09757c1.pdf [file c7ta09757c1.pdf]

## Supporting Information

### **Controllable growth of SnS<sub>2</sub> nanostructures on nanocarbon surfaces for Lithium-ion and Sodium-ion storage with high rate capability**

Bin Luo,<sup>a</sup> Yuxiang Hu,<sup>a</sup> Xiaobo Zhu,<sup>a</sup> Tengfei Qiu,<sup>b</sup> Linjie Zhi,<sup>b\*</sup> Mu Xiao,<sup>a</sup> Haijiao Zhang,<sup>c\*</sup> Mingchu Zou,<sup>d</sup> Anyuan Cao,<sup>d</sup> and Lianzhou Wang<sup>a\*</sup>

- <sup>a</sup> Nanomaterials Centre, School of Chemical Engineering and Australian Institute for Bioengineering and Nanotechnology, The University of Queensland. St Lucia QLD 4072, Australia. E-mail: l.wang@uq.edu.au
- <sup>b</sup> National Centre for Nanoscience and Technology, China. Zhongguancun, Beiyitiao No. 11 Beijing, 100190, P. R. China. E-mail: zhilj@nanoctr.cn
- <sup>c</sup> Institute of Nanochemistry and Nanobiology, Shanghai University, Shanghai 200444, China. E-mail: hjzhang128@shu.edu.cn
- <sup>d</sup> Department of Materials Science and Engineering, College of Engineering, Peking University. Beijing 100871, P. R. China

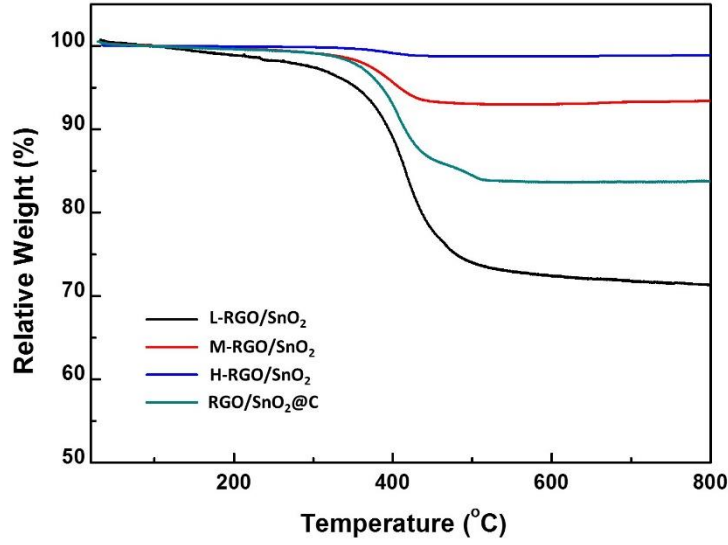

**Fig. S1.** TGA of the RGO/SnO<sub>2</sub> based composite precursors with different SnO<sub>2</sub> mass loading on RGO. The measurements were taken in air using a heating rate of 10°C min<sup>-1</sup>.

SnO<sub>2</sub> contents of L-RGO/SnO<sub>2</sub>, M-RGO/SnO<sub>2</sub>, H-RGO/SnO<sub>2</sub> and RGO/SnO<sub>2</sub>@C estimated from the thermal analysis are ca. 71.3, 93.4, 97.4 and 83.7 wt %, respectively. The corresponding SnS<sub>2</sub> contents of these samples after sulfuration were also estimated based on the following equation S1 as all SnO<sub>2</sub> would be converted into SnS<sub>2</sub> during the sulfuration process (equation S2), as shown in Table S1.

$$C_{SnS_2} (wt\%) = \frac{m_{SnS_2}}{m_{Carbon} + m_{SnS_2}} = 100\% \times \frac{(M_{SnS_2} / M_{SnO_2}) \times m_{SnO_2}}{(m_{Carbon / SnO_2} - m_{SnO_2}) + (M_{SnS_2} / M_{SnO_2}) \times m_{SnO_2}} \quad (S1)$$

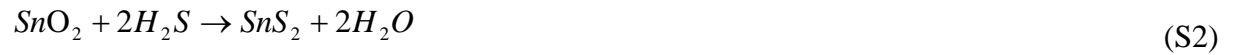

**Table S1.** SnO<sub>2</sub> contents and the corresponding SnS<sub>2</sub> contents of these samples after sulfuration of L-RGO/SnO<sub>2</sub>, M-RGO/SnO<sub>2</sub>, H-RGO/SnO<sub>2</sub> and RGO/SnO<sub>2</sub>@C.

|                         | SnO <sub>2</sub> content | Estimated SnS <sub>2</sub> content after sulfuration |
|-------------------------|--------------------------|------------------------------------------------------|
| L-RGO/SnO <sub>2</sub>  | 71.3                     | 75.1                                                 |
| M-RGO/SnO <sub>2</sub>  | 93.4                     | 94.4                                                 |
| H-RGO/SnO <sub>2</sub>  | 97.4                     | 97.8                                                 |
| RGO/SnO <sub>2</sub> @C | 83.7                     | 86.2                                                 |

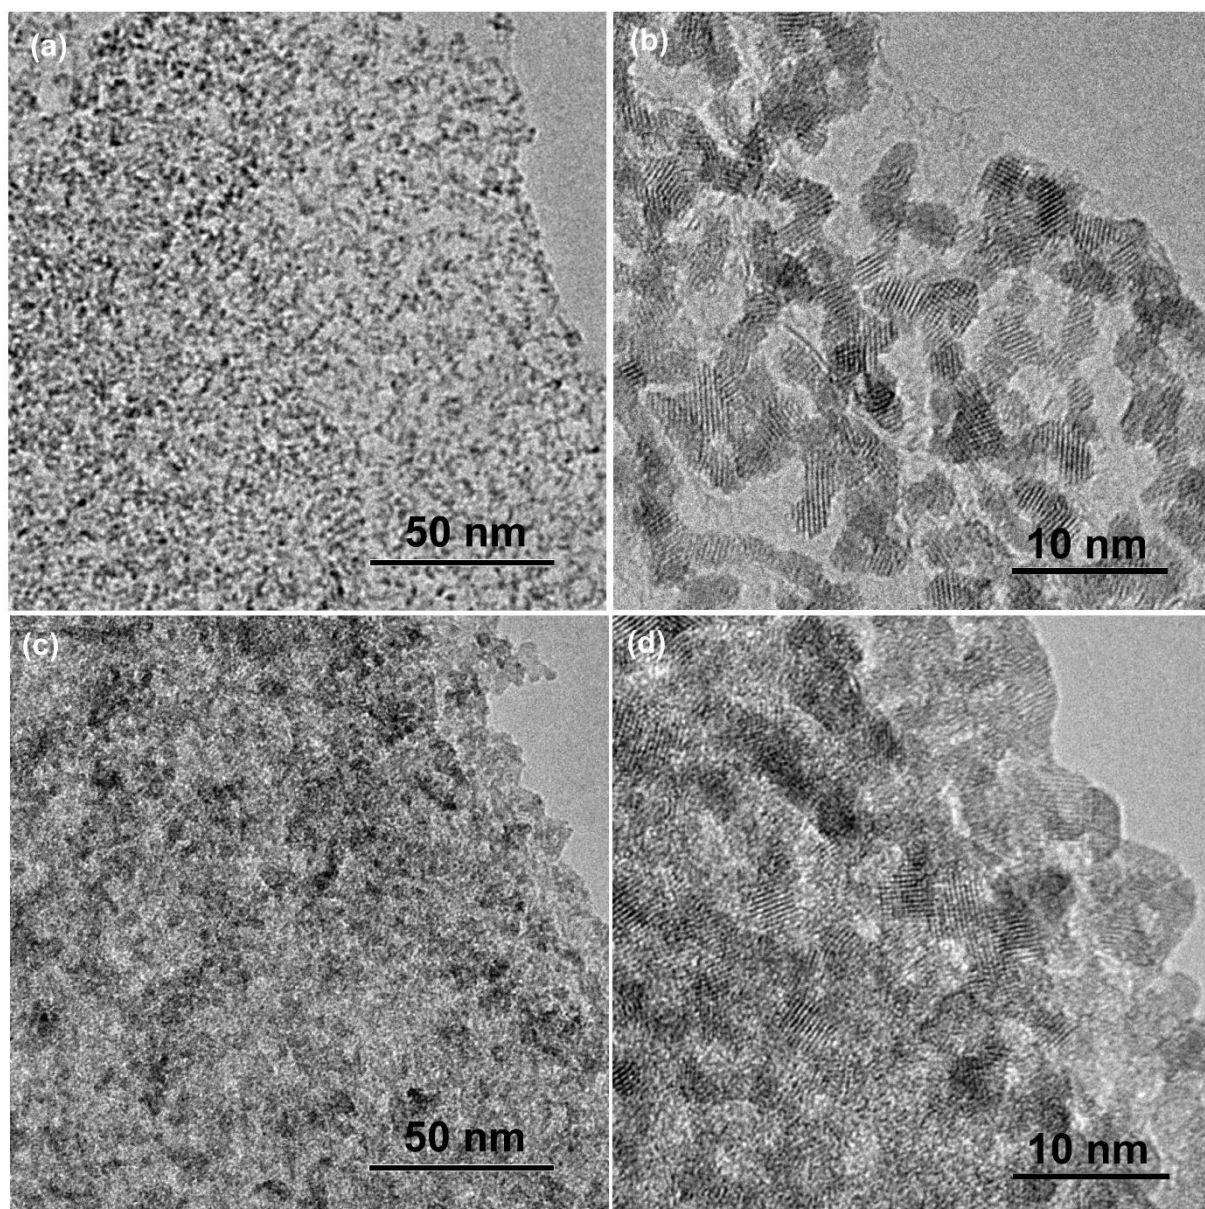

**Fig. S2.** TEM and HRTEM images of (a, b) the low SnO<sub>2</sub> mass loaded precursor (L-RGO/SnO<sub>2</sub>) and (c, d) the high SnO<sub>2</sub> mass loaded precursor (H-RGO/SnO<sub>2</sub>).

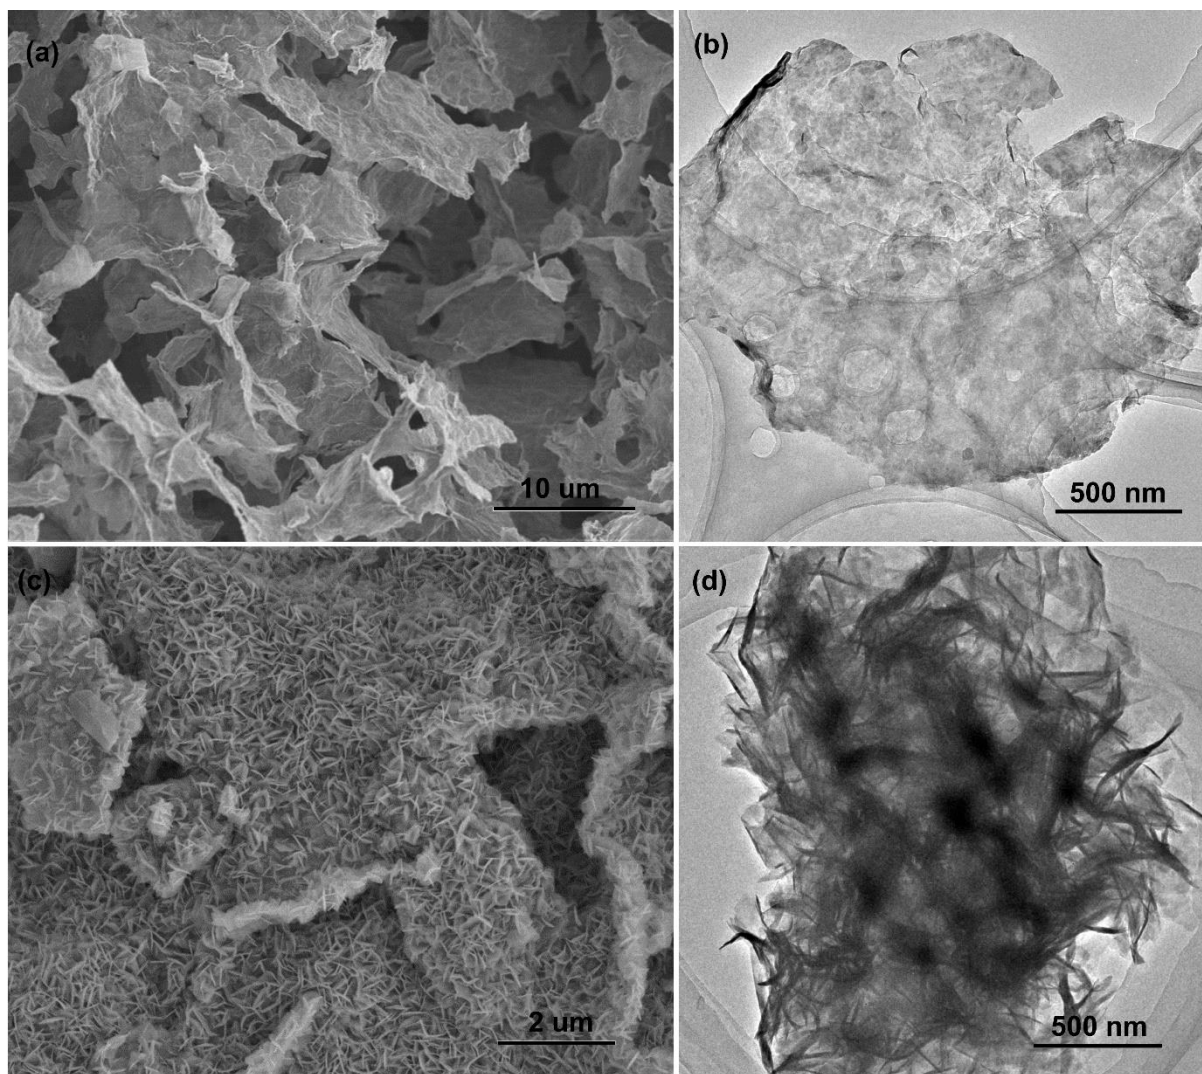

**Fig. S3.** Low magnification SEM and TEM images of (a ,b) P-RGO/SnS<sub>2</sub> and (c, d) V-RGO/SnS<sub>2</sub> composites.

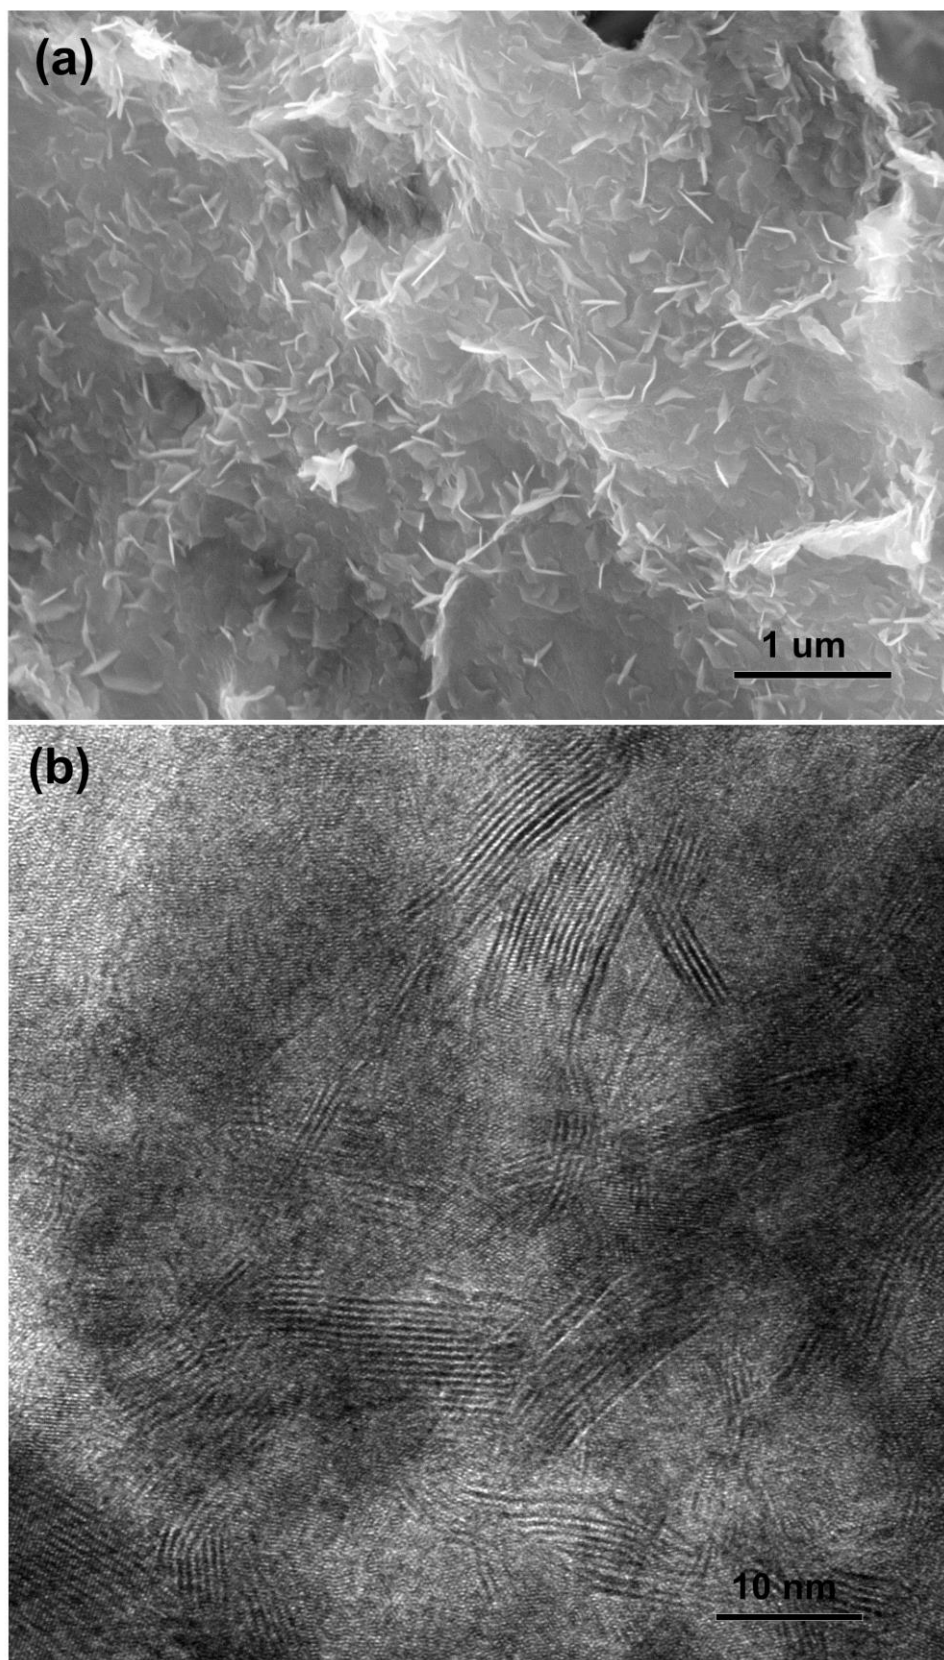

**Fig. S4** SEM and TEM images of the RGO/SnS<sub>2</sub> composite obtained from the medium SnO<sub>2</sub> mass loaded RGO/SnO<sub>2</sub> precursor (M-RGO/SnO<sub>2</sub>).



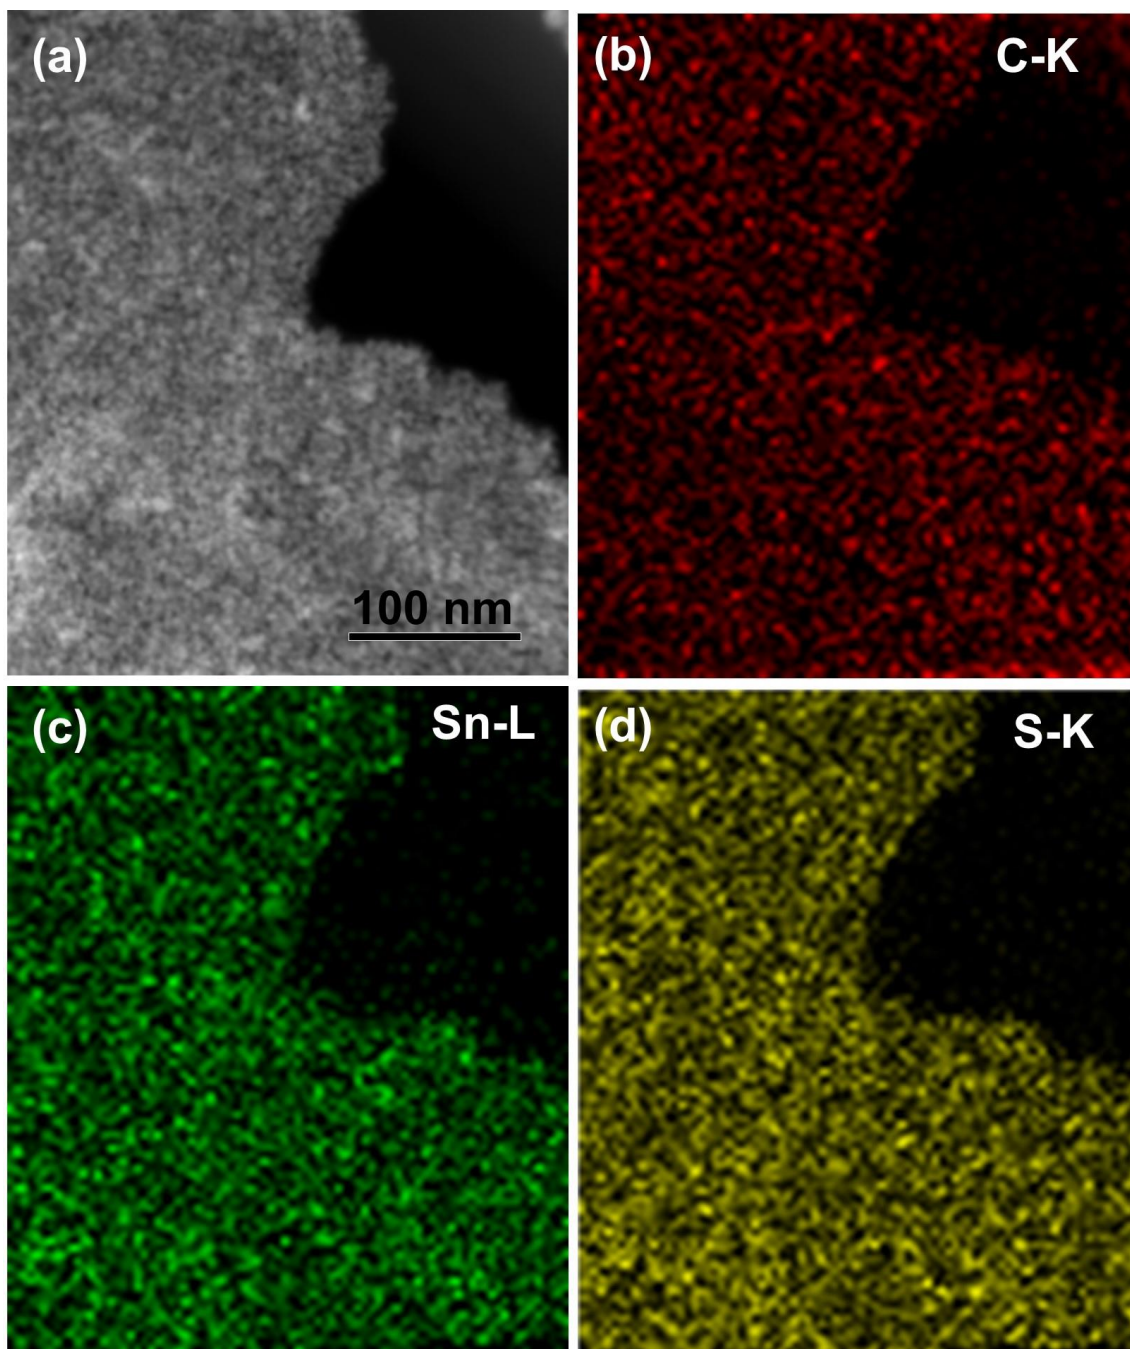

**Fig. S5.** (a) STEM image, and (b-d) Element mapping images of the RGO/SnS<sub>2</sub>@C composite, showing the uniform distribution of SnS<sub>2</sub> nanoparticles within the RGO backboned 2D carbon matrix.

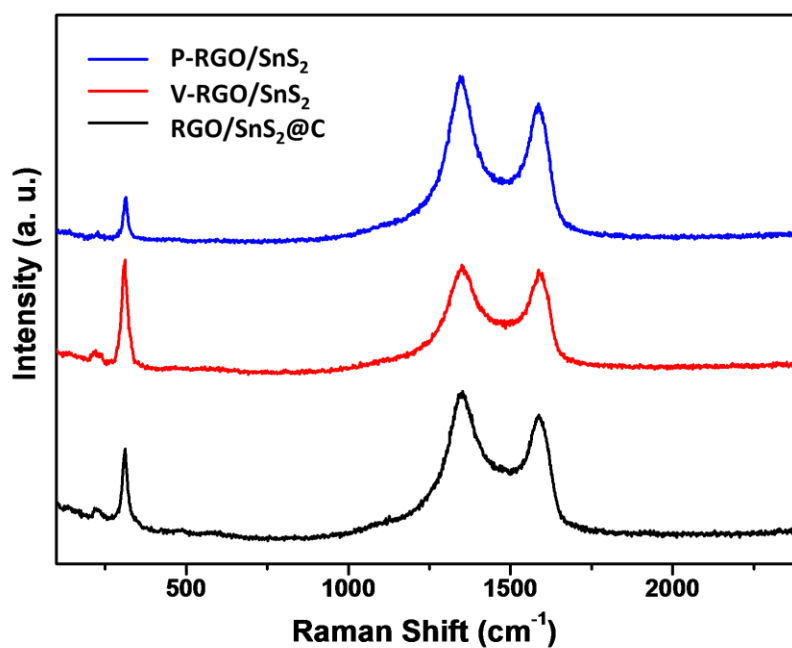

**Fig. S6** Raman spectra of P-RGO/SnS<sub>2</sub>, V-RGO/SnS<sub>2</sub> and RGO/SnS<sub>2</sub>@C composites. All the Raman spectra exhibit an intense peak at about 311 cm<sup>-1</sup>, which is attributed to the A<sub>1g</sub> mode of SnS<sub>2</sub>. The peak at about 1585 cm<sup>-1</sup> (G band) is related to the vibration of the sp<sup>2</sup>-bonded carbon atoms in a 2-dimensional hexagonal lattice, while the peak at about 1325 cm<sup>-1</sup> (D band) is related to the defects and disorder in the hexagonal graphitic layers.

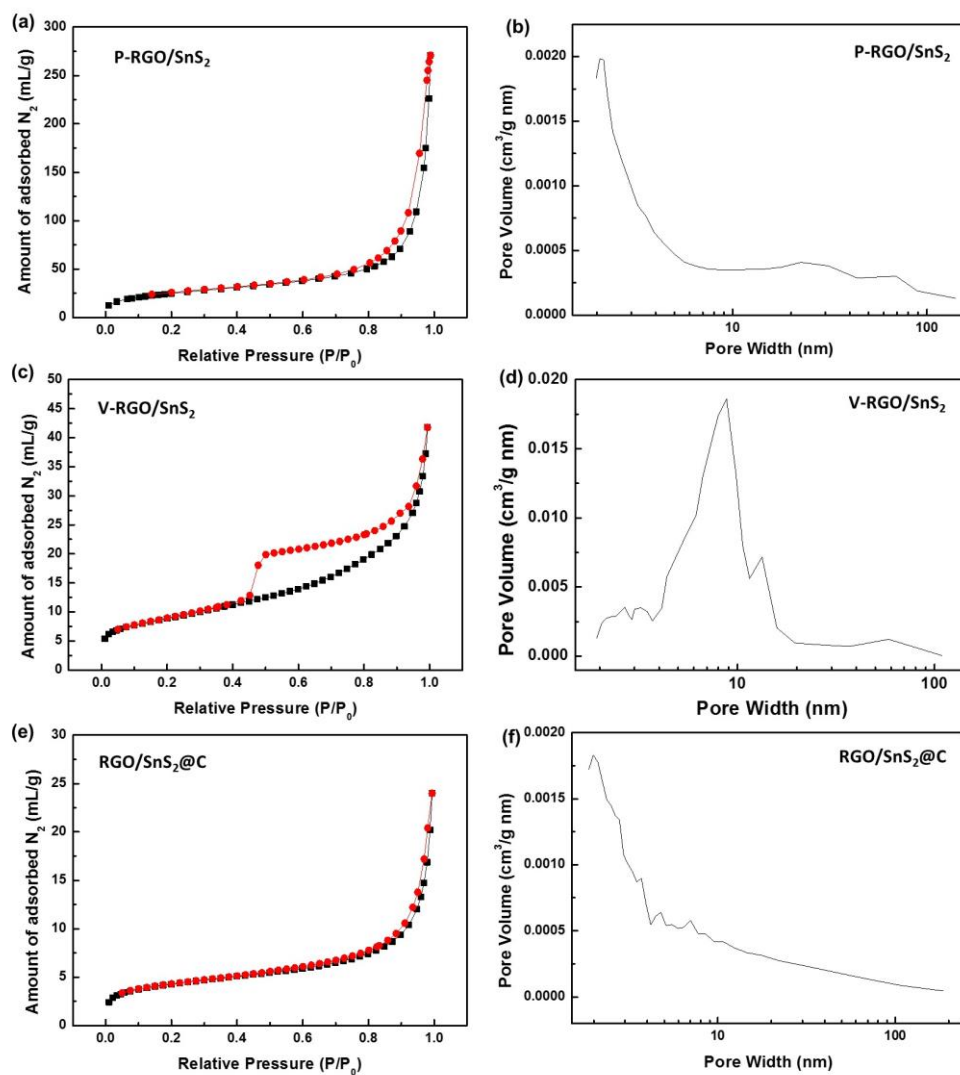

**Figure S7.** Nitrogen adsorption-desorption isotherms and pore-size distribution of (a, b) P-RGO/SnS<sub>2</sub>, (c, d) V-RGO/SnS<sub>2</sub> and (e, f) RGO/SnS<sub>2</sub>@C composites, respectively.



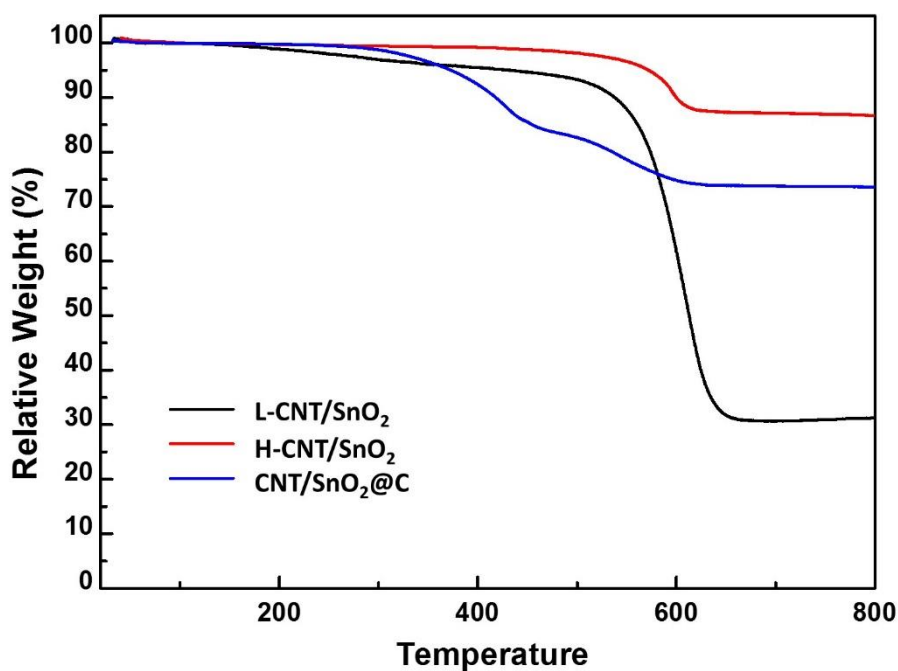

**Fig. S8.** TGA of the RGO/SnO<sub>2</sub> based composite precursors with different SnO<sub>2</sub> mass loading on RGO. The measurements were taken in air using a heating rate of 10°C min<sup>-1</sup>.

SnO<sub>2</sub> contents of L-CNT/SnO<sub>2</sub>, H-CNT/SnO<sub>2</sub> and CNT/SnO<sub>2</sub>@C estimated from the thermal analysis are ca. 31.2, 86.7 and 73.6 wt %, respectively. The corresponding SnS<sub>2</sub> contents of these samples after sulfuration were also estimated based on the following equation S1 as all SnO<sub>2</sub> would be converted into SnS<sub>2</sub> during the sulfuration process (equation S2), as shown in Table S2.

**Table S2.** SnO<sub>2</sub> contents and the corresponding SnS<sub>2</sub> contents of these samples after sulfuration of L-CNT/SnO<sub>2</sub>, H-CNT/SnO<sub>2</sub> and CNT/SnO<sub>2</sub>@C.

|                         | SnO <sub>2</sub> content | Estimated SnS <sub>2</sub> content after sulfuration |
|-------------------------|--------------------------|------------------------------------------------------|
| L-CNT/SnO <sub>2</sub>  | 31.2                     | 35.3                                                 |
| H-CNT/SnO <sub>2</sub>  | 86.7                     | 88.7                                                 |
| CNT/SnO <sub>2</sub> @C | 73.6                     | 77.1                                                 |

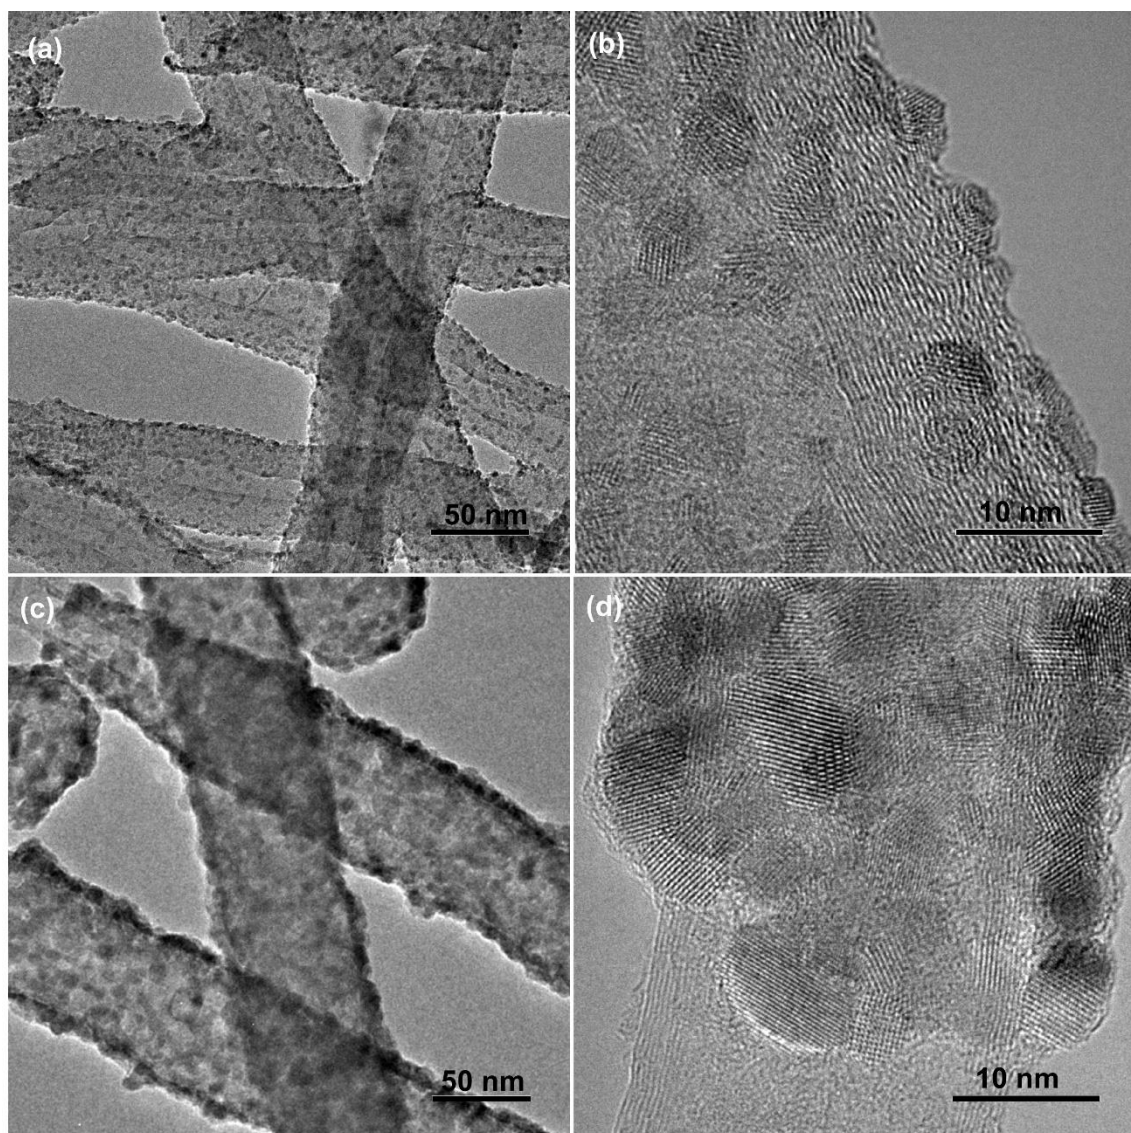

**Fig. S9.** TEM and HRTEM images of (a, b) the low SnO<sub>2</sub> mass loaded CNT/SnO<sub>2</sub> precursor (L-CNT/SnO<sub>2</sub>) and (c, d) the high SnO<sub>2</sub> mass loaded CNT/SnO<sub>2</sub> precursor (H-CNT/SnO<sub>2</sub>).

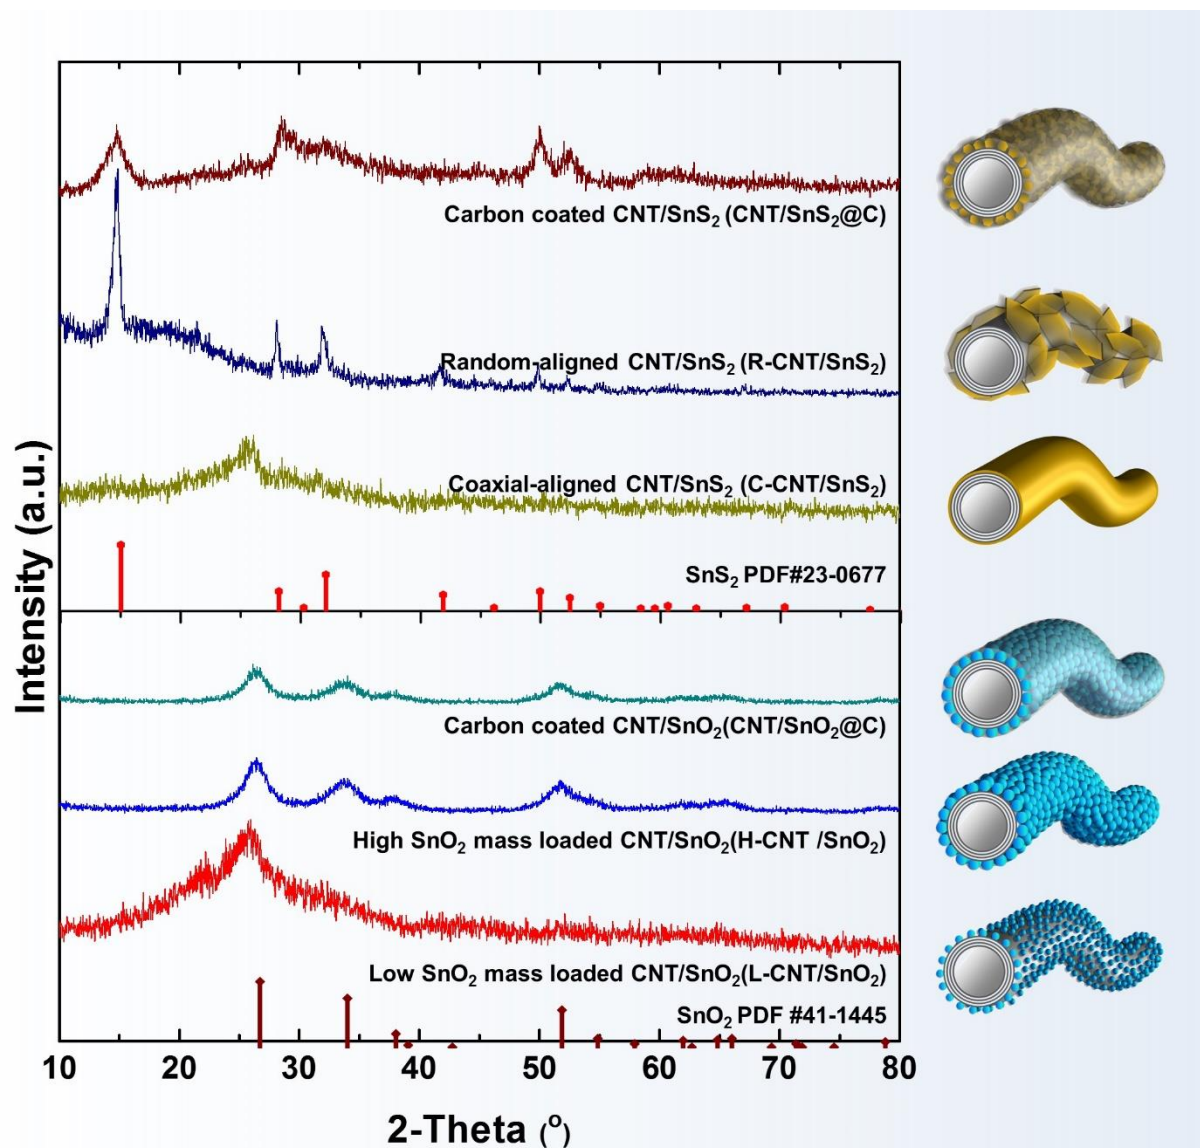

**Fig. S10.** X-ray diffraction patterns of the CNT based composites, including the L-CNT/SnO<sub>2</sub>, H-CNT/SnO<sub>2</sub> and CNT/SnO<sub>2</sub>@C precursors and the corresponding products after sulfuration, C-CNT/SnS<sub>2</sub>, R-CNT/SnS<sub>2</sub> and CNT/SnS<sub>2</sub>@C.



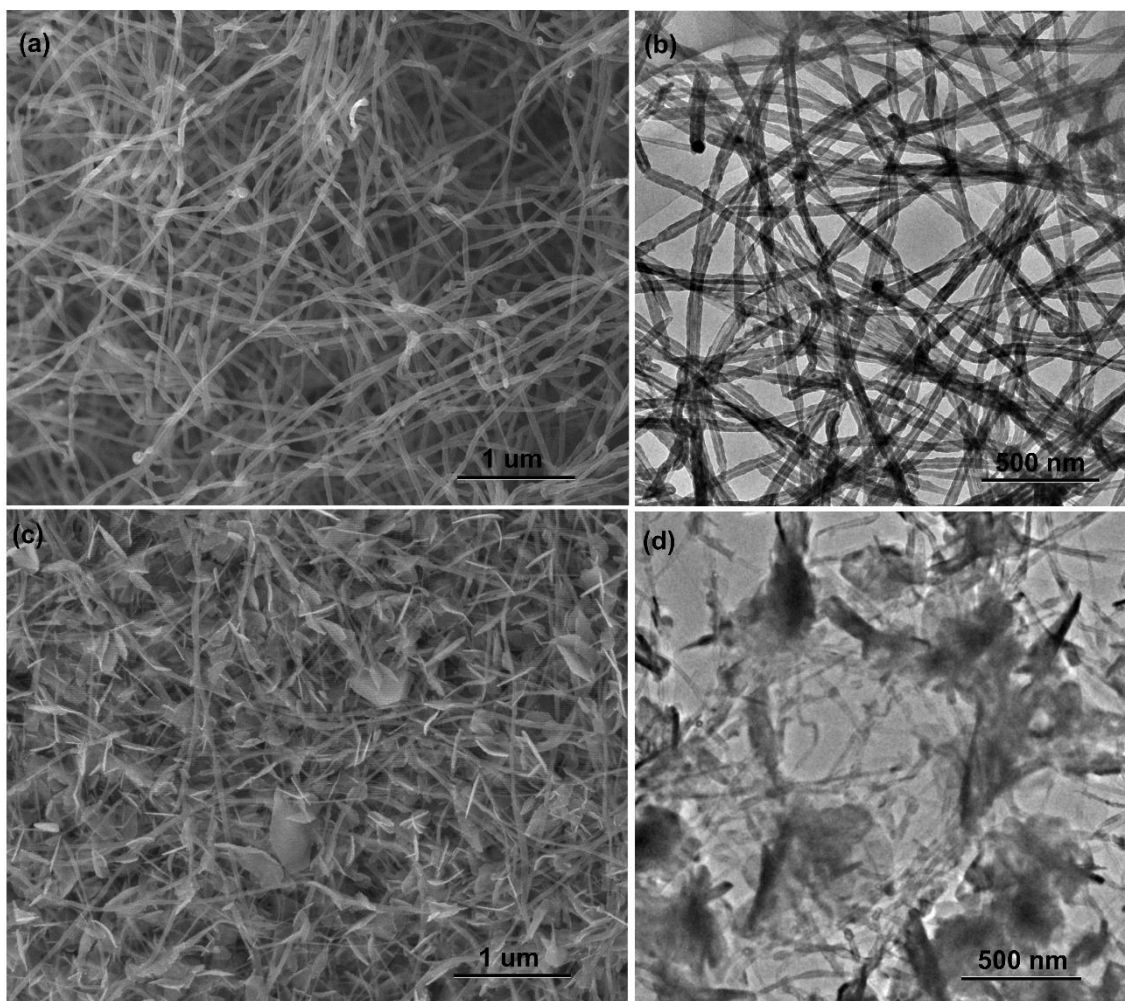

**Fig. S11.** Low magnification SEM and TEM images of (a ,b) C-CNT/SnS<sub>2</sub> and (c, d) R-CNT/SnS<sub>2</sub> composites.

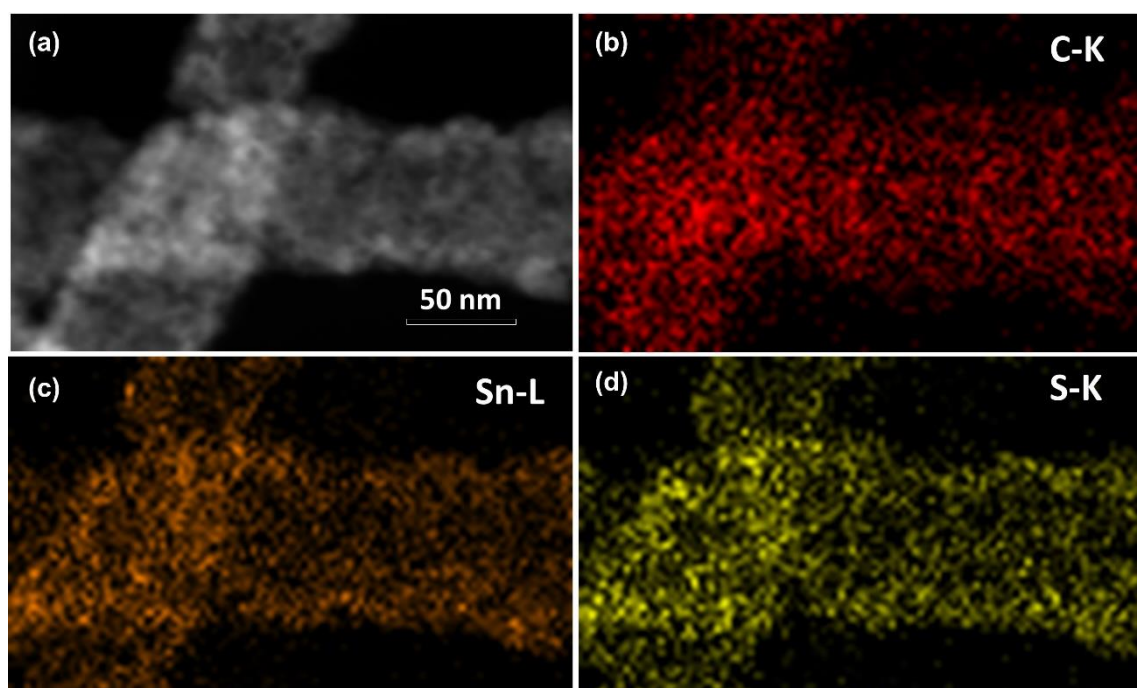

**Fig. S12.** (a) STEM image, and (b-d) Element mapping images of the CNT/SnS<sub>2</sub>@C composite.

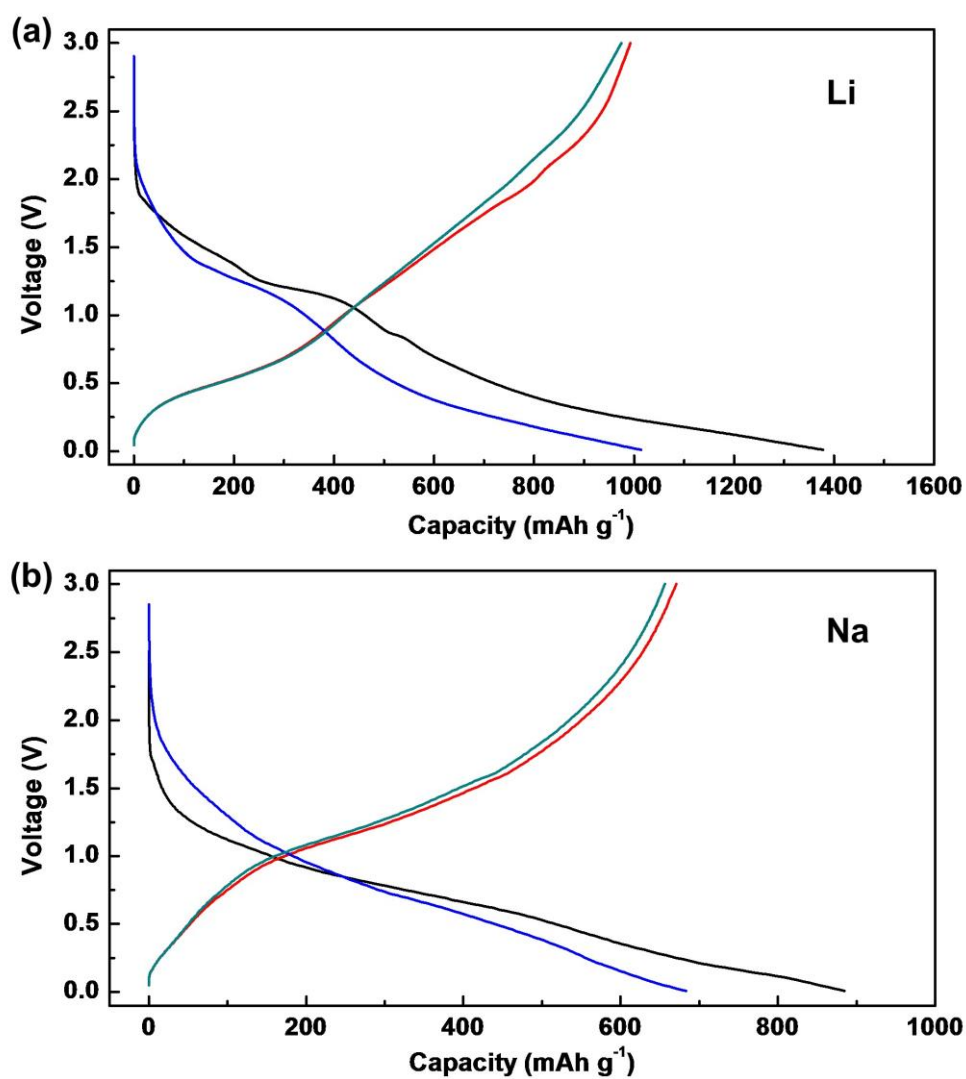

**Fig. S13.** Voltage profiles of the RGO/SnS<sub>2</sub>@C for (a) LIBs and (b) NIBs cycled at a current density of 100 mA g<sup>-1</sup> between 5mV and 3.0 V vs Li<sup>+</sup>/Li and Na<sup>+</sup>/Na, respectively.

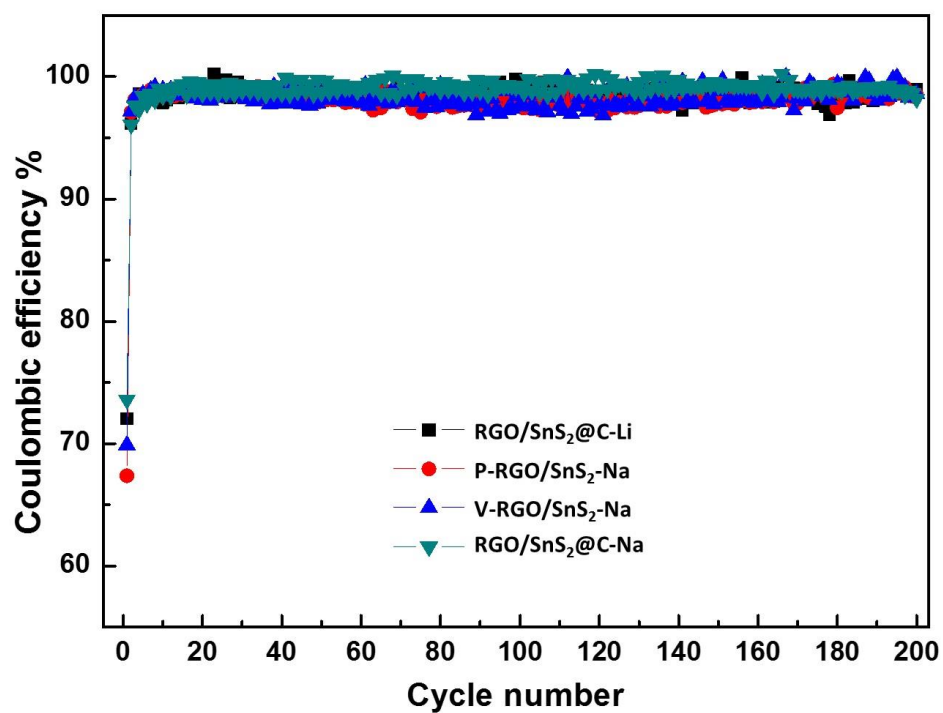

**Fig. S14.** Coulombic efficiency of P-RGO/SnS<sub>2</sub>, V-RGO/SnS<sub>2</sub>, and RGO/SnS<sub>2</sub>@C for LIBs and/or NIBs cycled at a current density of 100 mA g<sup>-1</sup> between 5mV and 3.0 V vs Li<sup>+</sup>/Li and Na<sup>+</sup>/Na, respectively.



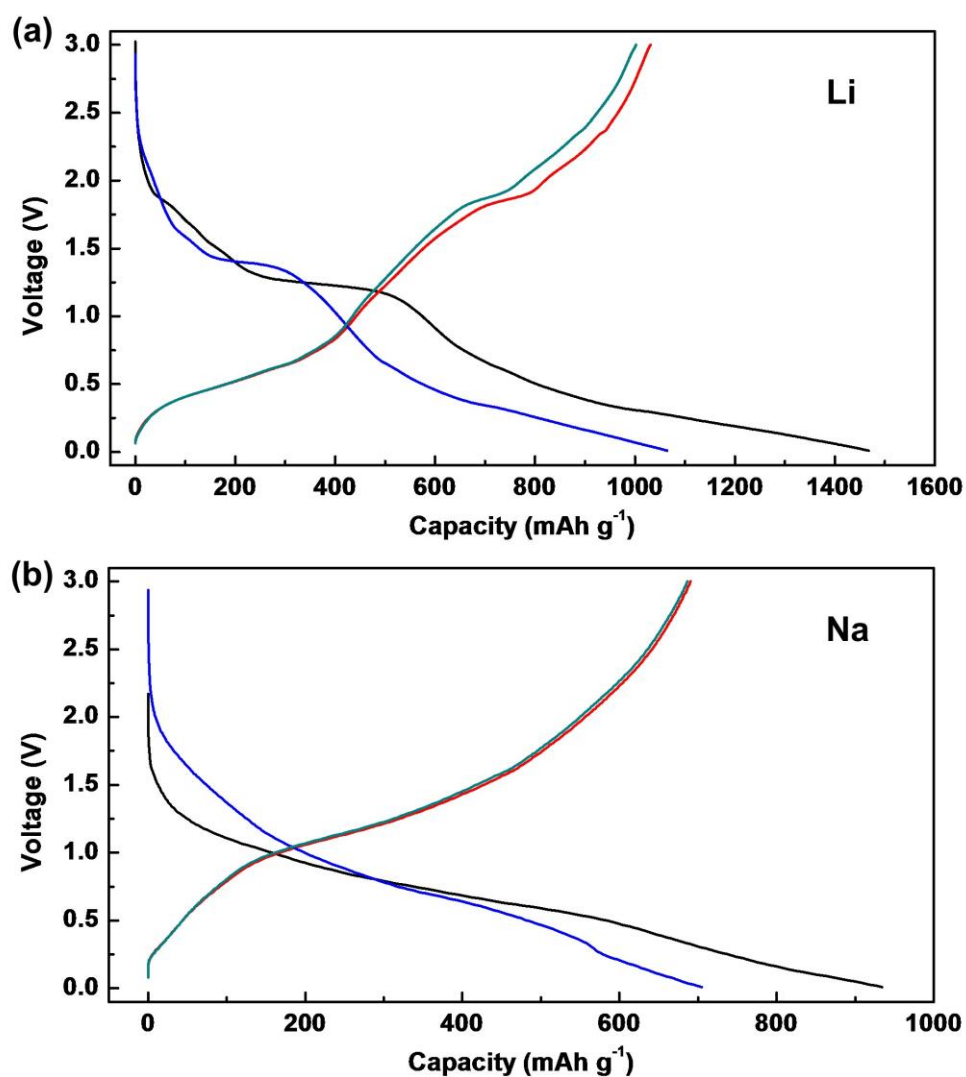

**Fig. S15.** Voltage profiles of the CNT/SnS<sub>2</sub>@C for (a) LIBs and (b) NIBs cycled at a current density of 100 mA g<sup>-1</sup> between 5mV and 3.0 V vs Li<sup>+</sup>/Li and Na<sup>+</sup>/Na, respectively.

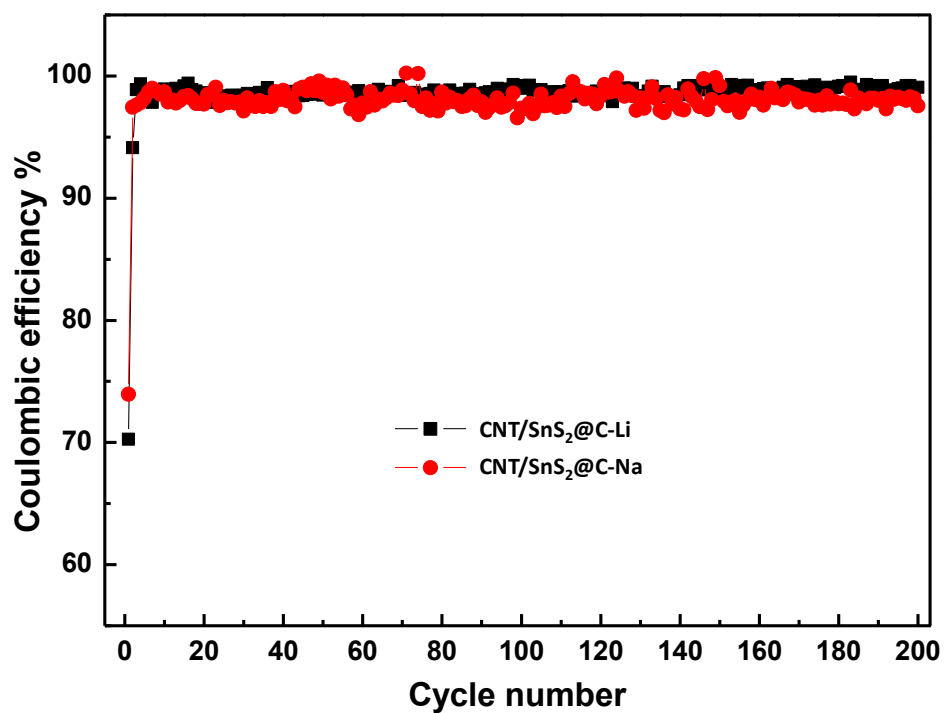

**Fig. S16.** Coulombic efficiency of the CNT/SnS<sub>2</sub>@C for LIBs and NIBs cycled at a current density of 100 mA g<sup>-1</sup> between 5mV and 3.0 V vs Li<sup>+</sup>/Li and Na<sup>+</sup>/Na, respectively.

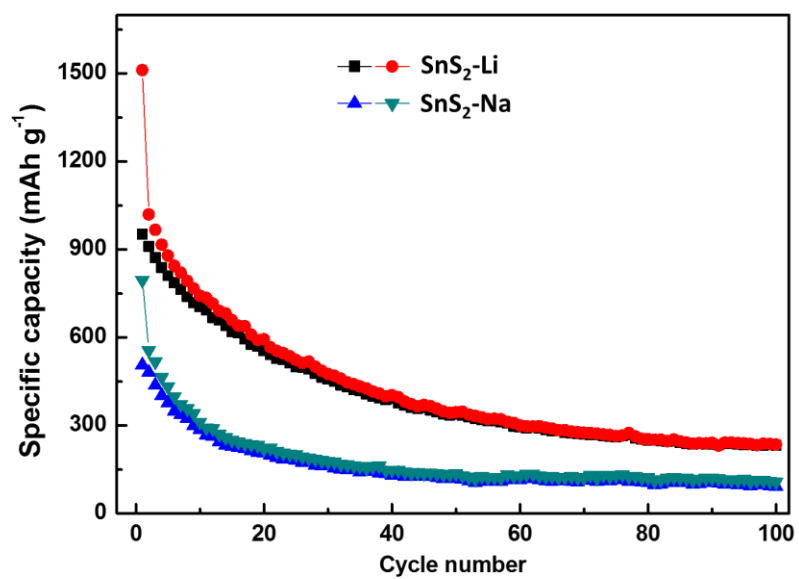

**Fig. S17.** Cycling performance of the as-synthesized bare  $\text{SnS}_2$  for Li-ion and Na-ion storage at 100 mA/g.

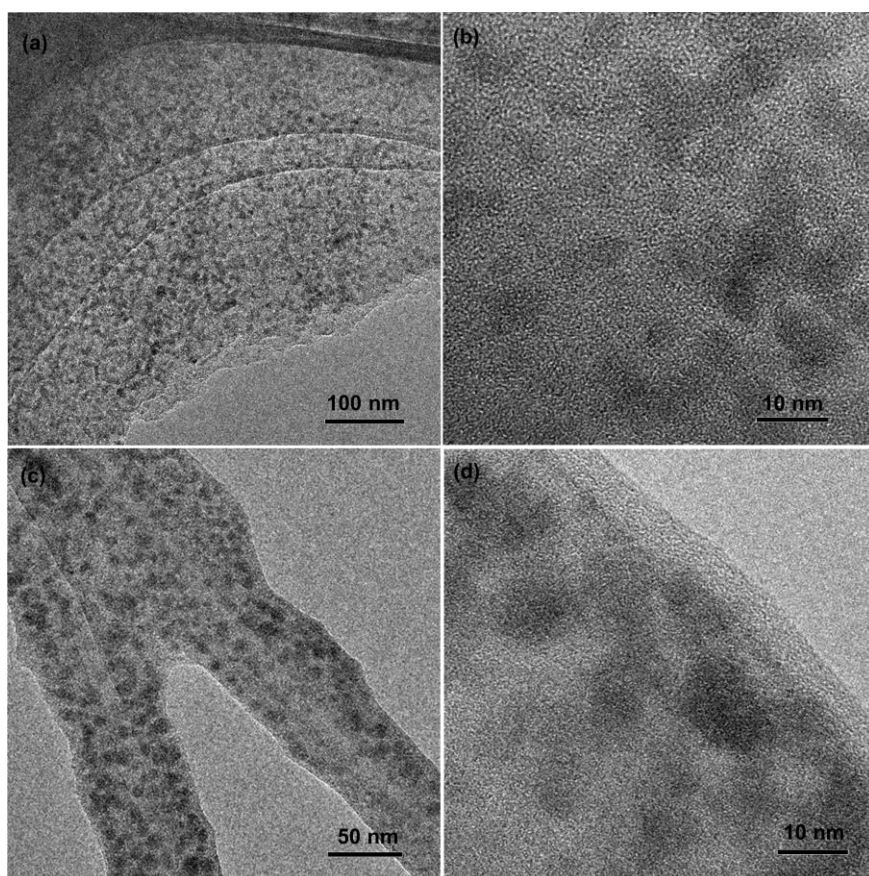

**Fig. S18.** TEM images of (a, b) RGO/ $\text{SnS}_2$ @C and (c, d) CNT/ $\text{SnS}_2$ @C electrodes for LIBs after 200 cycles.

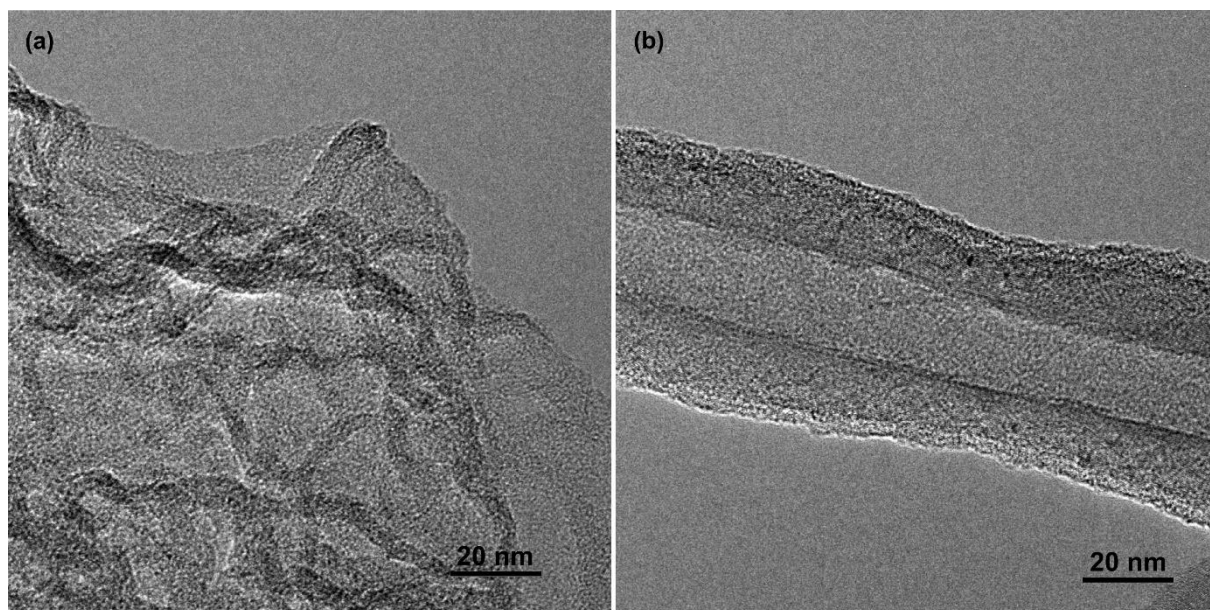

**Fig. S19.** TEM images of (a) the as-synthesized RGO/glucose-derived carbon (RGO@C) and (b) CNT/glucose-derived carbon (CNT@C) composites without  $\text{SnS}_2$  phase.

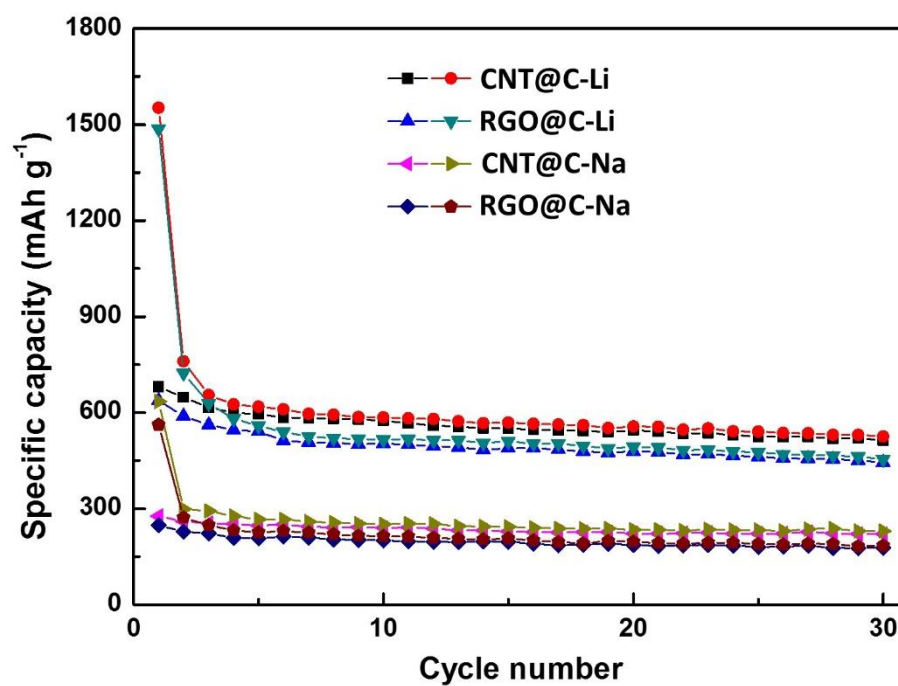

**Fig. S20.** Cycling performance of the as-synthesized RGO/glucose-derived carbon (RGO@C) and CNT/glucose-derived carbon (CNT@C) composites without  $\text{SnS}_2$  phase at 100 mA/g.



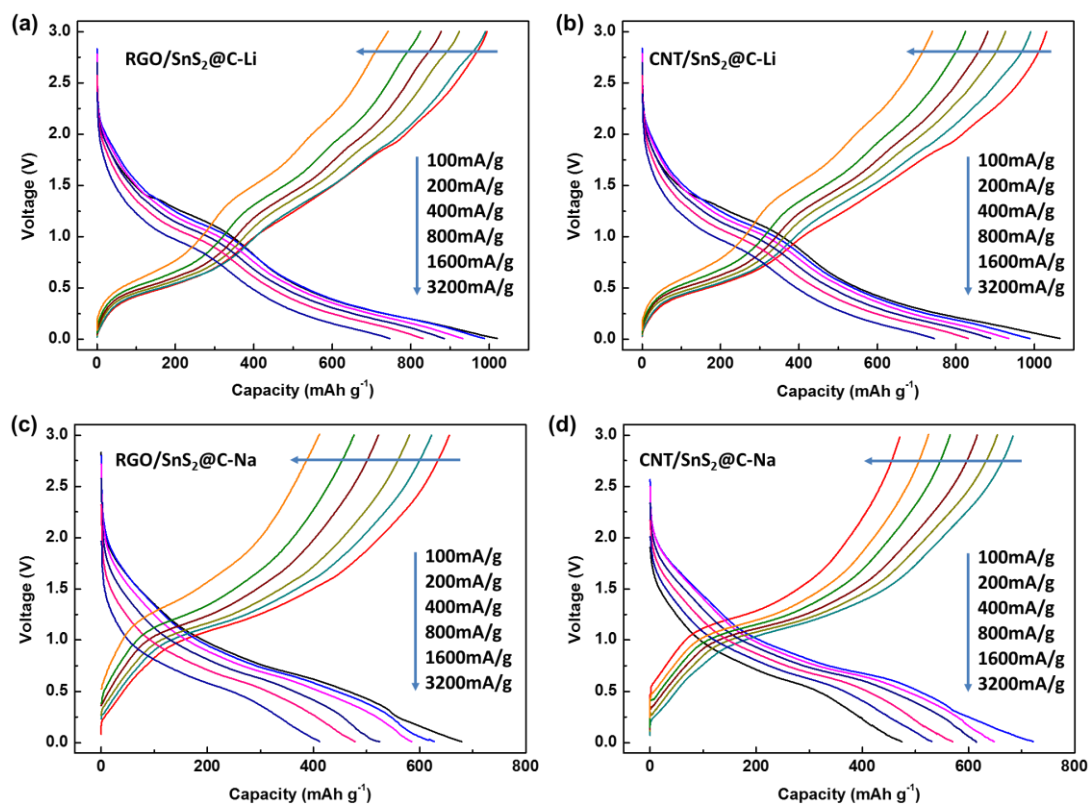

**Fig. S21.** Voltage profiles of the carbon coated composites for  $\text{Li}^+$  or  $\text{Na}^+$  storage at various current rates.

**Table S3.** Electrochemical performance comparison of some representative SnS<sub>2</sub>/nanocarbons composite anodes for lithium/sodium ion batteries.

|    | Materials                         | Tin Sulphide content (wt. %) | Testing Voltage window (V) | Cycling Performance                   |                                          |                                                           | Rate Capability                                                          | Ref.      |
|----|-----------------------------------|------------------------------|----------------------------|---------------------------------------|------------------------------------------|-----------------------------------------------------------|--------------------------------------------------------------------------|-----------|
|    |                                   |                              |                            | Current density (mA g <sup>-1</sup> ) | Initial Capacity (mAh g <sup>-1</sup> )* | Capacity retention(mAh g <sup>-1</sup> )/ cycling number* | Capacity (mAh g <sup>-1</sup> ) @Current density (mA g <sup>-1</sup> ) * |           |
| Li | Graphene/SnS <sub>2</sub>         | ~95                          | 0.01-1.3                   | 50                                    | 687                                      | 650/30                                                    | 230@6400                                                                 | [1]       |
|    | SnS <sub>2</sub> -RGO             | ~68.4                        | 0.005-3.0                  | 66                                    | 1077                                     | 896/40                                                    | 934@660                                                                  | [2]       |
|    | SnS <sub>2</sub> /graphene hybrid | ~70                          | 0.005-3.0                  | 800                                   | 864                                      | 704/100                                                   | 546@6400                                                                 | [3]       |
|    | SnS <sub>2</sub> -RGO             | ~93.2                        | 0.01-3.0                   | 120                                   | 738                                      | 564/60                                                    | 151@3000                                                                 | [4]       |
|    | SnS <sub>2</sub> on 3D graphene   | 53.7                         | 0.01-2.0                   | 1000                                  | 451                                      | ~450/50                                                   | 174@2000                                                                 | [5]       |
|    | carbon-coated SnS <sub>2</sub>    | 87                           | 0.0-1.2                    | 50                                    | 707                                      | 668/50                                                    | ~590@1C                                                                  | [6]       |
|    | SnS <sub>2</sub> /SWCNT           | 34.9                         | 0.01-3.0                   | 1000                                  | ~700                                     | 509/100                                                   | 498@2000                                                                 | [7]       |
|    | RGO/SnS <sub>2</sub> @C           | 86.2                         | 0.005-3.0                  | 100                                   | 992                                      | 908/200                                                   | 656@3200                                                                 | This work |
|    | CNT/SnS <sub>2</sub> @C           | 77.1                         | 0.005-3.0                  | 100                                   | 1031                                     | 940/200                                                   | 741@3200                                                                 | This work |
| Na | SnS <sub>2</sub> NC/EDA-RGO       | 75                           | 0.01-3.0                   | 200                                   | 749                                      | 680/100                                                   | 250@11200                                                                | [8]       |
|    | SnS <sub>2</sub> /C Nanospheres   | 41                           | 0.005-2.5                  | 50                                    | 660                                      | 600/100                                                   | 360@1000                                                                 | [9]       |
|    | 2D SnS <sub>2</sub> nanosheets    | 100                          | 0.005-3.0                  | 100                                   | 733                                      | 647/50                                                    | 435@2000                                                                 | [10]      |
|    | SnS <sub>2</sub> /rGO             | 81                           | 0.005-3.0                  | 800                                   | 469                                      | 400/1000                                                  | 337@12800                                                                | [11]      |
|    | Layered SnS <sub>2</sub> -RGO     |                              | 0.01-2.5                   | 200                                   | 630                                      | 628/100                                                   | 544@2000                                                                 | [12]      |
|    | SnS <sub>2</sub> /graphene        | 65.5                         | 0.005-3.0                  | 20                                    | 725                                      | 670/60                                                    | 463@640                                                                  | [13]      |
|    | SnS <sub>2</sub> -rGO Composite   | 88                           | 0.01-2.5                   | 200                                   | 630                                      | 627/100                                                   | -                                                                        | [14]      |
|    | SnS <sub>2</sub> /graphene        |                              | 0.01-2.5                   | 200                                   | 650                                      | 610/300                                                   | 326@4000                                                                 | [15]      |
|    | RGO/SnS <sub>2</sub> @C           | 86.2                         | 0.005-3.0                  | 100                                   | 650                                      | 580/200                                                   | 412@3200                                                                 | This work |
|    | CNT/SnS <sub>2</sub> @C           | 77.1                         | 0.005-3.0                  | 100                                   | 691                                      | 605/200                                                   | 462@3200                                                                 | This work |

\*: The gravimetric capacity values are based on the active material including carbon and tin sulphide.

## References

- [1] B. Luo, Y. Fang, B. Wang, J. Zhou, H. Song, L. Zhi, *Energ Environ Sci* **2012**, 5, 5226.
- [2] P. Chen, Y. Su, H. Liu, Y. Wang, *Acs Appl. Mater. Inter.* **2013**, 5, 12073.
- [3] S. Y. Liu, X. Lu, J. Xie, G. S. Cao, T. J. Zhu, X. B. Zhao, *Acs Appl. Mater. Inter.* **2013**, 5, 1588.
- [4] J. F. Yin, H. Q. Cao, Z. F. Zhou, J. X. Zhang, M. Z. Qu, *J. Mater. Chem.* **2012**, 22, 23963.
- [5] H. Zhi Xiang, W. Ye, W. Jen It, Y. Hui Ying, *2D Mater.* **2015**, 2, 024010.
- [6] H. S. Kim, Y. H. Chung, S. H. Kang, Y. E. Sung, *Electrochimica Acta* **2009**, 54, 3606.
- [7] Y. Liu, C. Wang, H. Yang, Z.-J. Shi, F.-Q. Huang, *Mater. Lett.* **2015**, 159, 329.
- [8] Y. Jiang, M. Wei, J. Feng, Y. Ma, S. Xiong, *Energ Environ Sci* **2016**.
- [9] J. Wang, C. Luo, J. Mao, Y. Zhu, X. Fan, T. Gao, A. C. Mignerey, C. Wang, *Acs Appl. Mater. Inter.* **2015**, 7, 11476.
- [10] W. Sun, X. Rui, D. Yang, Z. Sun, B. Li, W. Zhang, Y. Zong, S. Madhavi, S. Dou, Q. Yan, *ACS Nano* **2015**, 9, 11371.



- [11] Y. Zhang, P. Zhu, L. Huang, J. Xie, S. Zhang, G. Cao, X. Zhao, *Adv. Funct. Mater.* **2014**, n/a.
- [12] B. Qu, C. Ma, G. Ji, C. Xu, J. Xu, Y. S. Meng, T. Wang, J. Y. Lee, *Adv. Mater.* **2014**, 26, 3854.
- [13] X. Xie, D. Su, S. Chen, J. Zhang, S. Dou, G. Wang, *Chemistry – An Asian Journal* **2014**, 9, 1611.
- [14] C. Ma, J. Xu, J. Alvarado, B. Qu, J. Somerville, J. Y. Lee, Y. S. Meng, *Chem. Mater.* **2015**, 27, 5633.
- [15] Y. Liu, H. Kang, L. Jiao, C. Chen, K. Cao, Y. Wang, H. Yuan, *Nanoscale* **2015**, 7, 1325.
